# Supplementary material
Source: PubMed Central journal article supplement (PMC2898628)
Supplement: MB-003-b613673g-s001.pdf [file MB-003-b613673g-s001.pdf]

## Supporting Information

### Chemical Intervention Suggests a Critical Role for Lysyl Oxidase in Zebrafish Notochord Morphogenesis

#### Morphogenesis

Carrie Anderson,<sup>a‡</sup> Stephen J. Bartlett,<sup>b‡</sup> John Gansner,<sup>c</sup> Duncan Wilson,<sup>a</sup> Ling He,<sup>a</sup> Jonathan D. Gitlin,<sup>c</sup> Robert N. Kelsh<sup>\*a</sup> and James Dowden<sup>\*b,d</sup>

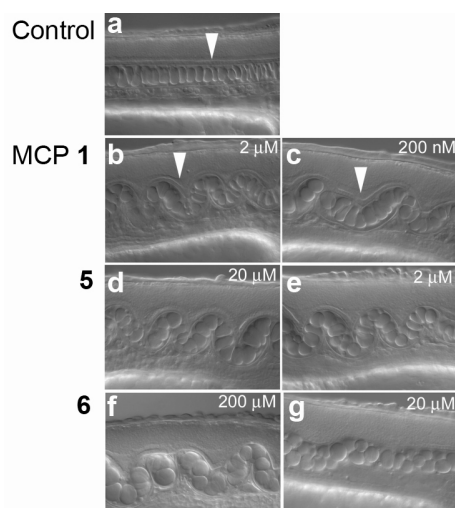

#### Figure S1: MCP derivatives 5 and 6 show similar effects on notochord morphology

Lateral views of posterior trunk of 25 hpf embryos after treatment with MCP 1, 5, or 6 at each specified concentration. Note that all treated embryos (B-I) show severely kinked notochord morphology, in contrast to control embryos (embryo medium with 1% DMSO, A), but that MCP 1 shows higher potency than the derivative compounds. Note too the larger, more spherical shape of the vacuolated notochord cells in treated embryos, compared with smaller, disc-shaped cells in controls. The distorted notochord results in distortions of the neural tube, as seen by comparing appearance of neurocoel (arrowhead) in untreated (A) and treated embryos (B,C).

Cyclohexanone (5.0 mmol, 515  $\mu$ l) was added to a suspension of thiosemicarbazide (5.0 mmol, 456 mg) and acetic acid (100  $\mu$ l) in methanol (10 ml). The suspension was heated at reflux, under nitrogen, for 24 h. On cooling the reaction mixture to room temperature a white precipitate formed, this was collected and washed with methanol to yield the *2-cyclohexylidene-hydrazinecarbothioamide* (650 mg, 3.8 mmol, 76%) as a colourless solid  $\delta_{\text{H}}$  (400 MHz;  $\text{CDCl}_3$ ) 8.77 (1H, br. s, C=NNH), 7.30 (1H, brs, C=SNH), 6.39 (1H, brs, C=SNH), 2.36-2.28 (4H, m,  $\text{CH}_2$ ) and 1.79-1.64 (6H, m,  $\text{CH}_2$ );  $\delta_{\text{C}}$  (100 MHz;  $\text{CDCl}_3$ ) 178.8 (C=S), 156.9 (C=N), 35.4, 27.1, 26.8, 25.9 and 25.5;  $m/z$  ( $\text{FAB}^+$ ) 171 (100%,  $\text{M}^+$ ); found  $\text{MH}^+$  172.0914;  $\text{C}_7\text{H}_{14}\text{N}_3\text{S}$  requires  $\text{M}^+$  172.0908.

### **2-butylidene-hydrazinecarbothioamide 3**

Butyraldehyde (25 mmol, 2.24 ml) was added to a solution of thiosemicarbazide (25 mmol, 2.28 g) in triethylorthoformate (50 ml) and stirred under nitrogen at ambient temperature for 16 h. The reaction mixture was partitioned between EtOAc and water, the organics were separated and washed with water ( $2 \times 100$  ml), brine (100 ml), dried ( $\text{MgSO}_4$ ) and evaporated under reduced pressure. The crude product was purified by column chromatography eluting with 0–40% EtOAc in petrol to yield the *2-butylidene-hydrazinecarbothioamide* (260 mg, 2.6 mmol, 11%) as a colourless solid  $R_{\text{F}}$  0.50 (40% EtOAc in petrol);  $\delta_{\text{H}}$  (400 MHz;  $\text{CDCl}_3$ ) 10.10 (1H, br. s, NH) 7.38 (1H, t,  $J$  5.4,  $\text{CH}=\text{N}$ ), 7.12 (1H, brs,  $\text{NHC}=\text{S}$ ), 6.52 (1H, brs,  $\text{NHC}=\text{S}$ ), 2.27 (2H, dt,  $J$  7.5 and 5.4,  $\text{CHCH}_2$ ), 1.59 (2H,  $\text{AX}_5$ ,  $J$  7.5,  $\text{CH}_2\text{CH}_3$ ) and 0.97 (3H, t,  $J$  7.5,  $\text{CH}_3\text{CH}_2$ );  $\delta_{\text{C}}$  (100 MHz;  $\text{CDCl}_3$ ) 177.9 (C=S), 148.7 (C=N), 34.2 ( $\text{CHCH}_2$ ), 19.6 ( $\text{CH}_2\text{CH}_3$ ) and 13.7 ( $\text{CH}_2\text{CH}_3$ );  $m/z$  ( $\text{FAB}^+$ ) 146 (100%,  $\text{MH}^+$ ).

### **2-cyclopentylidene-hydrazinecarbothioamide 4**

Cyclopentanone (5.0 mmol, 442  $\mu$ l) was added to a suspension of thiosemicarbazide (5.0 mmol, 456 mg) and acetic acid (100  $\mu$ l) in methanol (10 ml). The suspension was heated at reflux, under nitrogen, for 16 h. The reaction mixture was evaporated under reduced pressure, the residue was dissolved in  $\text{CH}_2\text{Cl}_2$  (40 ml) and washed with water ( $2 \times 40$  ml), saturated aqueous  $\text{NaHCO}_3$  solution ( $1 \times 40$  ml) and brine ( $1 \times 40$  ml). The organics were dried ( $\text{MgSO}_4$ ) and evaporated to yield the *2-cyclopentylidene-hydrazinecarbothioamide* (643 mg, 4.2 mmol, 82%) as a colourless solid  $\delta_{\text{H}}$  (400 MHz;  $\text{CDCl}_3$ ) 8.19 (1H, br. s, C=NNH), 6.97 (1H, br. s, C=SNH), 6.18 (1H, brs,

C=S<sub>NH</sub>), 2.21-2.08 (4H, m, CH<sub>2</sub>) and 1.70-1.56 (4H, m, CH<sub>2</sub>); δ<sub>C</sub> (100 MHz; CDCl<sub>3</sub>) 178.4 (C=S), 163.3 (C=N), 33.1, 27.6, 24.6 and 24.4; *m/z* (FAB<sup>+</sup>) 157 (100%, M<sup>+</sup>); found MH<sup>+</sup> 158.0750; C<sub>6</sub>H<sub>12</sub>N<sub>3</sub>S requires M<sup>+</sup> 158.0752.

### N-tert-Butoxycarbonylamino-N'-2-[(1-oxido-2-pyridinyl)thio] ethylenediamine 5

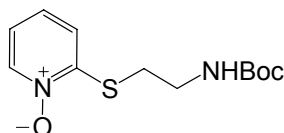

1-(N-tert-Butoxycarbonylamino)-2-bromoethane (3.0 mmol, 775 μl) was added to a stirring solution of 2-mercaptopyridine *N*-oxide (3.0 mmol, 381 mg) and triethylamine (6.0 mmol, 842 μl) in acetonitrile (10 ml) and the mixture stirred under nitrogen, at ambient temperature for 15 hours. The solvent was removed under reduced pressure and the crude product purified by column chromatography eluting with 5% MeOH in CH<sub>2</sub>Cl<sub>2</sub>, followed by lyophilization to yield the *N*-tert-Butoxycarbonylamino-N'-2-[(1-oxido-2-pyridinyl)thio] ethylenediamine (89 mg, 0.20 mmol, 91%) as a colourless powder δ<sub>H</sub> (270 MHz; CDCl<sub>3</sub>) 8.23 (1H, d, *J* 6.4, Ar-6H), 7.40 (1H, d, *J* 6.4, Ar-3H), 7.25 (1H, t, *J* 6.4, Ar-5H), 7.03 (1H, dt, *J* 6.4 and 1.8) 5.03 (1H, br. s, NH), 3.38 (2H, q, *J* 6.7, CH<sub>2</sub>NH), 3.05 (2H, t, *J* 6.7, SCH<sub>2</sub>) and 1.40 (9H, s, C(CH<sub>3</sub>)<sub>3</sub>); δ<sub>C</sub> (100 MHz; CD<sub>3</sub>OD) 158.6 (C), 154.3 (C), 140.5 (CH), 130.6 (CH), 123.7 (CH), 122.5 (CH), 80.5 (C), 40.3 (CH<sub>2</sub>), 30.9 (CH<sub>2</sub>), 28.9 (CH<sub>3</sub>); *m/z* (ES-HRES) C<sub>12</sub>H<sub>18</sub>N<sub>2</sub>O<sub>3</sub>SNa requires 293.0936 found 293.0939 (20%, MNa<sup>+</sup>) and C<sub>12</sub>H<sub>19</sub>N<sub>2</sub>O<sub>3</sub>S requires 271.1116 found 271.1111 (10%, MH<sup>+</sup>).

### N-(Biotinoyl)-N'-(acetyl 2-[(1-oxido-2-pyridinyl)thio] ethylenediamine 6

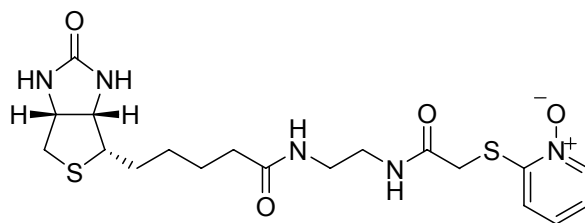

N-(Biotinoyl)-N'-(iodoacetyl] ethylenediamine (50 mg, 0.11 mmol) was added to a stirring solution of 2-mercaptopyridine *N*-oxide (0.11 mmol, 14 mg) and triethylamine (0.22 mmol 30 μl) in acetonitrile (10 ml) and the mixture stirred under nitrogen, at ambient temperature for 72 h. The solvent was removed under reduced pressure and the crude product purified silica chromatography

Supplementary Material (ESI) for Molecular BioSystems

This journal is © The Royal Society of Chemistry 2006

eluting with 10% MeOH in CH<sub>2</sub>Cl<sub>2</sub>, followed by lyophilization to yield the biotinylated compound as a colourless powder (89 mg, 0.20 mmol, 91%). *R<sub>F</sub>* 0.10 (10 % MeOH in CH<sub>2</sub>Cl<sub>2</sub>); δ<sub>H</sub> (400 MHz; DMSO) 8.32-8.26 (2H, m, NH and ArH<sub>3</sub>), 7.81 (1H, brs, NH), 7.42-7.32 (2H, m, ArH<sub>5</sub> and ArH<sub>6</sub>), 7.22 (1H, dt, *J* 6.8 and 2.4, ArH<sub>4</sub>), 6.45 (1H, brs, biotin NH), 6.38 (1H, brs, biotin NH), 4.32-4.27 (1H, m, CHCH<sub>2</sub>S), 4.15-4.10 (1H, m, CHCHS), 3.69 (2H, s, SCH<sub>2</sub>CO), 3.16-3.04 (5H, m, NHCH<sub>2</sub>CH<sub>2</sub>NH and SCHR), 2.81 (1H, dd, *J* 12.6 and 5.2, CHCH<sub>a/b</sub>S), 2.57 (1H, d, *J* 12.6, CHCH<sub>a/b</sub>S), 2.03 (2H, t, *J* 7.5, NHCOCH<sub>2</sub>CH<sub>2</sub>) and 1.65-1.21 (6H, m, CH<sub>2</sub>); δ<sub>C</sub> (100 MHz; DMSO) 172.3 (C=O), 167.2 (C=O), 162.7 (C=O), 150.8 (ArC<sub>2</sub>), 138.1 (ArC<sub>6</sub>), 125.5 (ArC<sub>3</sub>), 122.1 (ArC<sub>4</sub>), 121.3 (ArC<sub>5</sub>), 61.0 (NHCHCHS), 59.3 (NHCHCH<sub>2</sub>S), 55.4 (biotin SCHCH<sub>2</sub>), 39.5 (SCH<sub>2</sub> - under solvent peak), 38.7 (NHCH<sub>2</sub>CH<sub>2</sub>NH), 38.1 (NHCH<sub>2</sub>CH<sub>2</sub>NH), 35.3 (CH<sub>2</sub>CH<sub>2</sub>CONH), 33.6 (SCH<sub>2</sub>CO), 28.3 (CH<sub>2</sub>), 28.1 (CH<sub>2</sub>) and 25.2 (CH<sub>2</sub>); *m/z* (ES) 476 (100%, MNa<sup>+</sup>) and 454 (10%, MH<sup>+</sup>); *m/z* (ES-HRES) C<sub>19</sub>H<sub>27</sub>N<sub>5</sub>O<sub>4</sub>S<sub>2</sub>Na requires 476.1402 found 476.1406.
